1 **NormExpression: an R package**

2 **to normalize gene expression data using evaluated methods**

3  
4 Zhenfeng Wu<sup>12§</sup>, Weixiang Liu<sup>34</sup>, Haishuo Ji<sup>25</sup>, Deshui Yu<sup>2</sup>,

5 Hua Wang<sup>2</sup>, Liu Lin<sup>2</sup>, Jishou Ruan<sup>16\*</sup>, Shan Gao<sup>25\*</sup>

6  
7 1. School of Mathematical Sciences, Nankai University, Tianjin 300071, P.R.China.

8 2. College of Life Sciences, Nankai University, Tianjin, Tianjin 300071, P.R.China.

9 3. School of Biomedical Engineering, Health Science Center, Shenzhen University,  
10 Shenzhen 518060, P.R.China.

11 4. Guangdong Provincial Key Laboratory of Biomedical Measurements and Ultrasound  
12 Imaging, Shenzhen 518060, P.R.China.

13 5. Institute of Statistics, Nankai University, Tianjin 300071, P.R.China.

14 6. State Key Laboratory of Medicinal Chemical Biology, Nankai University, Tianjin  
15 300071, P.R.China.

16  
17  
18  
19 § These authors contributed equally to this paper.

20 \* The corresponding authors.

21 SG: [gao\\_shan@mail.nankai.edu.cn](mailto:gao_shan@mail.nankai.edu.cn)

22 JR: [jsruan@nankai.edu.cn](mailto:jsruan@nankai.edu.cn)

23

## 24 **Abstract**

25

26

27

28

29

30

31

32

33

34

35

36

37

38

39

40

41

42

43

44

45

46

47

48

49

50

51

52

53

Data normalization is a crucial step in the gene expression analysis as it determines the validity of its downstream analyses. Although many metrics has been designed to evaluate the relative success of these methods, the results by different metrics did not show consistency. Based on the previous work, we designed a new metric named Area Under normalized CV threshold Curve (AUCVC) to evaluate 13 commonly used normalization methods and achieved consistency in our evaluation results using both bulk RNA-seq and scRNA-seq data from the same library construction protocol. These gene expression data, normalization methods and evaluation metrics have been included in an R package named NormExpression. NormExpression provides a framework for researchers to select normalization methods with a fast and simple way to evaluate different methods, particularly some data-driven methods or their own methods.

**Keyword:** gene expression; normalization; evaluation; R package; scRNA-seq

## 54 Introduction

55 Global gene expression analysis provides quantitative information about the  
56 population of RNA species in cells and tissues [1]. High-throughput technologies to  
57 measure global gene expression levels started with Serial Analysis of Gene Expression  
58 method (SAGE) and are widely used with microarray and RNA-seq [2]. Recently, single-  
59 cell RNA sequencing (scRNA-seq) has been used to simultaneously measure the expression  
60 levels of genes from a single-cell and to provide a higher resolution of cellular differences  
61 than bulk RNA-seq, which can only produce an expression value for each gene by  
62 averaging its expression levels across a large population of cells [3]. Gene expression raw  
63 data from these high-throughput technologies must be normalized to remove technical  
64 variation so that meaningful biological comparisons can be made. Data normalization is a  
65 crucial step in the gene expression analysis as it determines the validity of its downstream  
66 analyses. Although the significance of gene expression data normalization has been  
67 demonstrated [4], how to successfully select a normalization method is still a controversial  
68 problem, particularly for scRNA-seq data.

69 Basically, two classes of methods are available to normalize gene expression data.  
70 They are the control-based normalization and the average-bulk normalization. The former  
71 class of methods assumes the total expression level summed over a small group of genes is  
72 approximately the same across all the samples. The latter class of methods assumes most of  
73 genes are not Differentially Expressed (DE) genes across all the samples. The control-based  
74 normalization often uses RNA from a group of internal control genes (*e.g.* housekeeping  
75 genes) or external spike-in RNA (*e.g.* ERCC RNA [5]), while the average-bulk  
76 normalization is more commonly used for their universality. Five average-bulk  
77 normalization methods designed to normalize bulk RNA-seq data are library size, median of  
78 the ratios of observed counts that is also referred to as the DESeq method [6], Relative Log  
79 Expression (RLE), upperquartile (UQ) and Trimmed Mean of M values (TMM) [7].  
80 Recently, three new methods have been introduced as Total Ubiquitous (TU), Network  
81 Centrality Scaling (NCS) and Evolution Strategy (ES) with best performance among 15  
82 tested methods [8].

83 Although many metrics has been designed to evaluate the relative success of these  
 84 methods, the results by different metrics did not show consistency. In 2013, Gustavo *et al.*  
 85 designed two novel and mutually independent metrics to evaluate 15 normalization methods  
 86 and achieved consistent results using bulk RNA-seq data [8]. Based on their work, we  
 87 designed a new metric named Area Under normalized CV threshold Curve (AUCVC) and  
 88 tested it using both bulk RNA-seq and scRNA-seq data from the same library construction  
 89 protocol. As a result, the evaluation by both our metric AUCVC and their metrics achieved  
 90 consistency. On the other hand, with many new normalization methods developed,  
 91 researchers need a fast and simple way to evaluate different methods, particularly some  
 92 data-driven methods or their own methods rather than obtain information from published  
 93 evaluation results, which could have bias or mistakes, *e.g.* misunderstanding of RLE, UQ  
 94 and TMM methods [9]. To satisfy this demand, we developed an R package  
 95 NormExpression to include gene expression data, normalization methods and evaluation  
 96 metrics used in this study and provide a framework for researchers to evaluate and select  
 97 methods for the normalization of their gene expression data.

**A.**

$$\begin{bmatrix} x_{11} & \cdots & x_{1j} & \cdots & x_{1n} \\ \vdots & \ddots & \vdots & & \vdots \\ x_{i1} & \cdots & x_{ij} & \cdots & x_{in} \\ \vdots & & \vdots & \ddots & \vdots \\ x_{m1} & \cdots & x_{mj} & \cdots & x_{mn} \end{bmatrix} \times \begin{bmatrix} f_1 \\ \vdots \\ f_j \\ \vdots \\ f_n \end{bmatrix}$$

**B.**

For all methods:  $f_j = f_j / \exp\left[\frac{1}{n} \sum_{j=1}^n \log(f_j)\right]$

---

Library size:  $f_j = 10^6 / N_j^*$

DESeq(RLE):  $f_j = 1/s_j$

$$s_j = \exp\left[\text{median}\left(\log(x_{ij}) - \frac{1}{n} \sum_{k=1}^n \log(x_{ik})\right)\right]$$

Upperquartile:  $f_j = 10^6 / N_j s_j$      $s_j = Q_3(x_{ij} / N_j)$

98

99

Figure 1

100 **Results**

## 101 **Normalization factor and library size**

102 In total, 13 normalization methods (**Materials and Methods**) have been included in  
103 the R package NormExpression. They are Housekeeping Genes (HG7), External RNA  
104 Control Consortium (ERCC), Total Read Number (TN), Total Read Count (TC), Cellular  
105 RNA (CR), Nuclear RNA (NR), the ratios of observed counts (DESeq), Relative Log  
106 Expression (RLE), upperquartile (UQ), Trimmed Mean of M values (TMM), Total  
107 Ubiquitous (TU), Network Centrality Scaling (NCS) and Evolution Strategy (ES). Currently,  
108 all the commonly used methods are used to normalize a raw gene expression matrix (n  
109 samples by m genes) by the multiplication of a factor to each column of it and produce a  
110 normalized gene expression matrix (**Figure 1A**). This factor is named as normalization  
111 factor in the package NormExpression or scaling factor in TU, NCS and ES methods. In  
112 NormExpression, the reciprocal of normalization factor is named as library size (**Figure**  
113 **1B**), which is also named as size factor in the Bioconductor package DESeq [6]. Definitions  
114 of normalization factor and size factor in the Bioconductor package edgeR [7] are different  
115 from the definition of normalization factor in NormExpression and the definition of size  
116 factor in DESeq. RLE, UQ and TMM in edgeR produce normalization factors to adjust  
117 library sizes, which should be used to calculate the Counts Per Million (CPM) for the  
118 normalization of gene expression data and CPM should be calculated by one million  
119 multiplying reciprocals of adjusted library sizes (**Figure 1B**). However, edgeR provides a  
120 function named calcNormFactors to produce normalization factors for library-size  
121 adjustment, which have been wrongly used for the normalization of gene expression data in  
122 many studies [9]. Since ES, HG7, ERCC, TN, TC, CR, NR and TU produce normalization  
123 factors by the estimation of library sizes as CPM, their normalization factors are amplified  
124 by one million for a uniform representation (**Figure 1B**) in NormExpression. DESeq, RLE,  
125 UQ and TMM have been modified to ignore zero values for both scRNA-seq and bulk  
126 RNA-seq data and the resulting normalization factors need be further normalized by their  
127 geometric mean values (**Figure 1B**). UQ and TMM use library sizes estimated by NR. After  
128 modification, RLE is identical to DESeq. We verified that these modifications did not  
129 change the evaluation or normalization results.

130

## 131 Evaluation of 13 normalization methods

132 In the previous study [8], Gustavo *et al.* had quantified success of normalization  
 133 methods by the number of uniform genes (**Materials and Methods**) and used the  
 134 Coefficient of Variation (CV) cutoff 0.25 to determine the number of uniform genes for  
 135 each method. This metric was designed based on the theory that the relative values among  
 136 different normalization methods were quite stable, although the absolute number of uniform  
 137 genes depended on the cutoff value. However, it is almost impossible to determine a CV  
 138 cutoff for scRNA-seq data since the CV in scRNA-seq data has a much more large dynamic  
 139 range than that in bulk RNA-seq data.

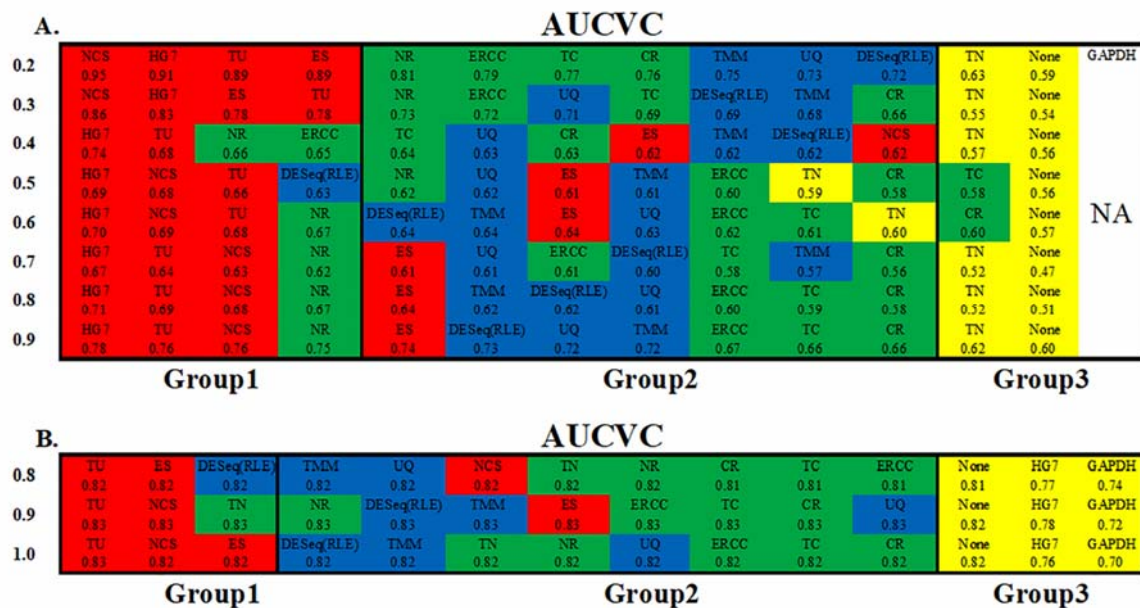

140

141

**Figure 2.**

142 Inspired by Area Under the receiver operating characteristic Curve (AUC) [10], we  
 143 designed a new metric named Area Under normalized CV threshold Curve (AUCVC) to  
 144 evaluate 13 normalization methods using one scRNA-seq dataset scRNA663 and one bulk  
 145 RNA-seq dataset bkrNA18 (**Materials and Methods**). A single housekeeping gene  
 146 GAPDH was also used for comparison in the evaluation of normalization methods using  
 147 bulk RNA-seq data, but it was not available for that using scRNA-seq data due to zero  
 148 counts of GAPDH in many samples. Parameter grid of non-zero ratio (**Materials and**  
 149 **Methods**) from 0.2 to 0.9 for scRNA663 and from 0.8 to 1 for bkrNA18 was used to

150 produce AUCVC values of all methods (**Figure 2**). For each non-zero ratio, TU used the  
151 maximum AUCVC, which had been determined by testing all possible combinations of  
152 presence rate, lower and upper cutoffs (**Materials and Methods**) at 5% resolution. The  
153 presence rate was tested from 0.2 to 0.6 for scRNA663 and set 1 for bkRNA18. The lower  
154 cutoff was tested from 5% to 40% and the upper cutoff was tested from 60% to 95%. In  
155 addition, the calculation only considered each combination of lower and upper cutoffs  
156 which produced ubiquitous genes (**Materials and Methods**) more than 1,00 for scRNA663  
157 and more than 1,000 for bkRNA18. For each non-zero ratio, NCS and ES used the  
158 ubiquitous genes produced by the TU method, when it achieved the maximum AUCVC.  
159 The raw gene expression matrix (None) was also used to produce AUCVC values for  
160 comparison.

161 The evaluation results using both scRNA663 and bkRNA18 achieved consistency that  
162 all the normalization methods were classified into three groups (**Figure 2**) based on their  
163 AUCVC values sorted in descending order. The first group including TU, NCS and ES  
164 achieved the best performances using both scRNA663 and bkRNA18. The second group  
165 including ERCC, TC, CR, NR, DESeq, RLE, UQ and TMM achieved medial performances  
166 using both scRNA663 and bkRNA18. In the second group, ERCC, TC, CR and NR  
167 outperformed DESeq, RLE, UQ and TMM using scRNA663, while DESeq, RLE, UQ and  
168 TMM outperformed ERCC, TC, CR and NR using bkRNA18. The third group achieved the  
169 poorest performances, including TN and None for scRNA663 (**Figure 2A**) and HG7,  
170 GAPDH and None for bkRNA18 (**Figure 2B**). HG7 and GAPDH achieved the poorest  
171 performances using bkRNA18, which suggested that a predefined set of housekeeping  
172 genes could not be appropriate guides for data normalization of bulk RNA-seq data.  
173 However, it could be coincidental that HG7 was classified into the first group using  
174 scRNA663. TN outperformed the second group of methods using bkRNA18 but was  
175 outperformed by the second group of methods using scRNA663.

176 The evaluation results by the medians of Spearman Correlation Coefficients (SCCs)  
177 (**Materials and Methods**) and the cluster analysis results were also consistent with the  
178 evaluation results by AUCVC. Generally speaking, a normalization method with a higher  
179 AUCVC value produced a lower median of Spearman Correlation Coefficients (SCCs)

180 between normalized expression profiles of ubiquitous gene pairs using both scRNA-seq and  
 181 bulk RNA-seq data. The hierarchical clustering result showed that 13 methods had been  
 182 classified into the same groups (**Figure 3CF**) by SCCs between normalization factor pairs  
 183 as those (**Figure 2AB**) by AUCVC. By our new designed metric AUCVC, TU, NCS and  
 184 ES were evaluated as the best normalization methods using both scRNA-seq and bulk  
 185 RNA-seq data, which enhanced the discovery using only bulk RNA-seq data in the previous  
 186 study [8]. Since the non-zero ratio 0.2 allowed the maximum number of uniform genes for  
 187 calculation, we presented this snapshot of evaluation results to show the consistency of the  
 188 evaluation results using both scRNA663 (**Figure 3ABC**) and bkRNA18 (**Figure 3DEF**).

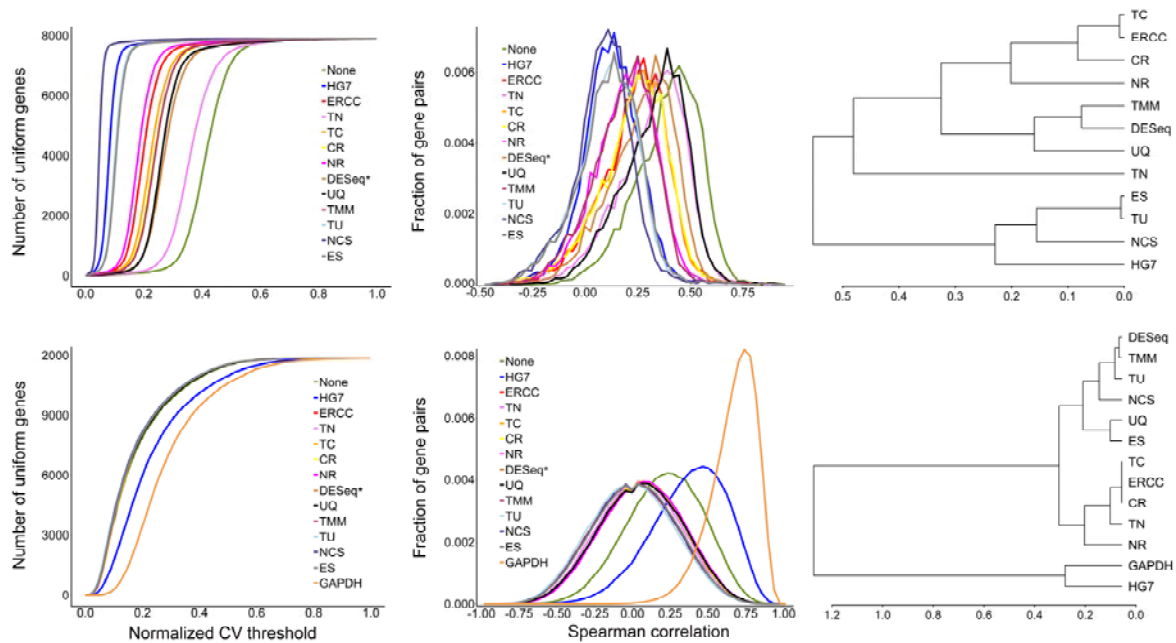

190 **Figure 3.**

189

190

### 191 **Implementation and availability**

192 The gene expression data (scRNA663 and bkRNA18), normalization methods and  
 193 evaluation metrics (AUCVC and SCCs) have been included in the R package  
 194 NormExpression. All the functions except the NCS and ES methods have been  
 195 implemented in R programs [2] for their running on R platforms of any version. The NCS  
 196 and ES methods had been implemented in Perl programs on the Linux system by Gustavo *et*  
 197 *al.* [8] but they need be installed with many Perl modules. We have modified them into a  
 198 stand-alone program (**Supplementary file 2**).



199 A quick evaluation is usually started with 10 normalization methods, which are HG7,  
200 ERCC (if available), TC, CR, NR, DESeq, RLE, UQ, TMM and TU. The quick evaluation  
201 produce AUCVC values of 10 methods and the raw gene expression matrix for users to  
202 evaluate and select methods. NCS and ES are not included in 10 methods, since they have a  
203 similar performance of TU but are much more time consuming. The non-zero ratio and  
204 presence rate can be set to 1 to calculate AUCVC for bulk RNA-seq data, while they need  
205 be set to appropriate values (default 0.2) for scRNA-seq data to avoid parameter grid. Based  
206 on our experiences, **both non-zero ratio and presence rate need be set to the values to ensure**  
207 **that both the product of the sample number multiplying non-zero ratio and that of the**  
208 **sample number multiplying presence rate are larger than 100 for scRNA-seq data.**

209

## 210 **Materials and Methods**

### 211 **Datasets**

212 In the previous study by Lin Liu *et al.* (SRA: SRP113436), 663 single-cell samples and  
213 18 bulk samples had been sequenced using the Smart-seq2 scRNA-seq protocol. In this  
214 study, we built a scRNA-seq dataset including 653 single cells from colon tumor tissues and  
215 10 single cells from distal tissues (>10 cm) as control. We also built a bulk RNA-seq dataset  
216 including nine samples from colon tumor tissues and nine samples from distal tissues.  
217 Samples with total read number less than 288,289 were removed in the data filtering step.  
218 The cleaning and quality control of both scRNA-seq and bulk RNA-seq data were  
219 performed using the pipeline Fastq\_clean [15] that was optimized to clean the raw reads  
220 from Illumina platforms. Using the software STAR [11] v2.5.2b, we aligned all the cleaned  
221 scRNA-seq and bulk RNA-seq reads to the human genome GRCh38/hg38 and the  
222 expression levels of 57,992 annotated genes (57,955 nuclear genes and 37 mitochondrial  
223 genes) were quantified. Non-polyA RNAs were not discarded to test the robustness of  
224 normalization methods, although the Smart-seq2 protocol theoretically had only captured  
225 polyA RNAs. In addition, the expression levels of 92 ERCC RNA and the long non-coding  
226 RNA (lncRNA) MDL1 in human mitochondrial [12] were also quantified. ERCC RNA had  
227 been spiked into 208 single-cell samples before library construction, the expression levels

228 of ERCC RNA in other 455 single-cell samples and 18 bulk samples were simulated by  
229 linear regression. Finally, two datasets were named scRNA663 ( $58085 \times 663$ ) and  
230 bkRNA18 ( $58085 \times 18$ ) and included into the R package NormExpression.

231

## 232 **Normalization methods**

233 All 13 methods in the package NormExpression are HG7, ERCC, TN, TC, CR, NR,  
234 DESeq, RLE, UQ, TMM, TU, NCS and ES. HG7, ERCC, TN, TC, CR, NR and TU are  
235 based on a set of pre-selected genes and each of these methods uses the gene expression  
236 level summed over these pre-selected genes in a sample as the library size (**Figure 1B**) to  
237 calculate the normalization factor. HG7 includes seven genes (UBC, HMBS, TBP, GAPDH,  
238 HPRT1, RPL13A and ACTB), which had been used to achieve the best evaluation result  
239 among those using all possible combinations of tested housekeeping genes in the previous  
240 study by Gustavo *et al.* [8]. ERCC is a set of commonly used spike-in RNA consisting of 92  
241 polyadenylated transcripts with short 3' polyA tails but without 5' caps [5]. The pre-selected  
242 genes used by HG7, ERCC, and TU are seven housekeeping genes, 92 ERCC RNA and  
243 ubiquitous genes (described below), respectively. NR only counts reads which have been  
244 aligned to nuclear genomes, while CR counts reads which have been aligned to both nuclear  
245 and mitochondrial genomes. The library size estimated by TC is equal to that estimated by  
246 CR plus that estimated by ERCC. TN uses the number of all reads which can be aligned to  
247 ERCC RNA, nuclear and mitochondrial genomes.

248 The DESeq method was obtained from the Bioconductor package DESeq [6] and  
249 modified to process scRNA-seq data. RLE, UQ and TMM were obtained from the  
250 Bioconductor package edgeR [7] and modified to process scRNA-seq data. TU, NCS and  
251 ES were obtained from the previous study by Gustavo *et al.* [8]. Since TU sums counts of  
252 all ubiquitous genes as the library size to calculate the normalization factor, a process to  
253 select ubiquitous genes (describe below) has been integrated into the TU method. TU  
254 maximizes AUCVC instead of the number of resulting uniform genes to select ubiquitous  
255 genes in the R package NormExpression.

256

## 257 **Uniform genes and ubiquitous genes**

258 A uniform gene was defined if the Coefficient of Variation (CV, **Formula 1**) of its  
259 post-normalization expression levels across all samples was not more than a cutoff.  
260 Ubiquitous genes were defined as the intersection of a trimmed sets of all samples [8]. This  
261 trimmed set of genes were selected for each sample by 1) excluding genes with zero values,  
262 2) sorting the non-zero genes by expression level in that sample, and 3) removing the upper  
263 and lower ends of the sample-specific expression distribution. Gustavo *et al.* determined the  
264 upper and lower cutoffs by testing all possible combinations of lower and upper cutoffs at  
265 5% resolution to maximize the number of resulting uniform genes using one bulk RNA-seq  
266 dataset [8]. The size of a scRNA-seq dataset is usually very large, which could result in a  
267 very small or even empty set of ubiquitous genes, since the number of ubiquitous genes  
268 depends on the sizes of datasets. To select ubiquitous genes using scRNA-seq data, we  
269 defined a parameter named presence rate, which required that one selected ubiquitous gene  
270 must appear in at least a proportion of the trimmed sets.

271

## 272 **Evaluation metrics**

273 In the previous study [8], Gustavo *et al.* designed two novel and mutually independent  
274 metrics, which were the number of uniform genes and Spearman Correlation Coefficients  
275 (SCCs) between expression profiles of gene pairs. Two basic ideas to support these two  
276 evaluation metrics are successful normalization methods increase the number of uniform  
277 genes and decrease the correlation between the expression profiles of gene pairs. In this  
278 study, we designed a new metric AUCVC instead of the number of uniform genes to  
279 evaluate normalization methods. We randomly selected 1,000,000 ubiquitous gene pairs to  
280 calculate the medians of SCCs. Then, we compared the evaluation results of all the  
281 normalization methods by the medians of SCCs with those by AUCVC.

282 AUCVC is created by plotting the number of uniform genes (y-axis) at each  
283 normalized CV (**Formula 2**) threshold (x-axis). To determine the number of uniform genes  
284 using scRNA-seq data containing a high frequency of zeros, **we only considered genes with**  
285 **non-zero expression values divided by the sample number not less than a threshold, which**  
286 **was designed as a parameter non-zero ratio.** Since a high or a low normalized CV threshold  
287 produces more false or less uniform genes, it is reasonable to consider the overall

288 performance of each method at various threshold settings instead of that at one specific  
289 threshold setting. In formula 1 and 2, symbols have the same meanings as those in figure 1  
290 and  $n^*$  does not count zero elements in each sample.

291

292

$$293 \quad CV_i = \left( \sqrt{\frac{1}{n} \sum_{j=1}^n (x_{ij} - \bar{x}_i)^2} \right) / \bar{x}_i, \quad \bar{x}_i = \frac{1}{n} \sum_{j=1}^n x_{ij} \quad (1)$$

$$294 \quad \text{Normalized } CV_i = \left\{ CV_i - \min_i(CV_i) \right\} / \left\{ \max_i(CV_i) - \min_i(CV_i) \right\}$$
$$CV_i = \left( \sqrt{\frac{1}{n^*} \sum_{j=1}^{n^*} (\log_2(x_{ij}) - \bar{x}_i)^2} \right) / \bar{x}_i, \quad \bar{x}_i = \frac{1}{n^*} \sum_{j=1}^{n^*} \log_2(x_{ij}), \quad x_{ij} > 0 \quad (2)$$

## 295 **Conclusion and Discussion**

296

## 297 **Acknowledgments**

298 We thank Professor Sui Huang and Dr. Joseph Zhou from Institute for Systems  
299 Biology (ISB) their hosts on Shan Gao' visiting to ISB.

300

## 301 **Funding**

302 This work was supported by grants from by National Key Research and  
303 Development Program of China (2016YFC0502304-03) to Defu Chen and Fundamental  
304 Research Funds for the Central Universities (for Nankai University) to Shan Gao.

305

## 306 **Competing interests**

307 Non-financial competing interests are claimed in this study.

308

309

## 310 Authors' contributions

311 SG conceived this project. SG and JR supervised this project. ZW, WL and SL  
312 performed programming. ZW, DY and HJ analyzed the data. WD prepared all the figures,  
313 tables and additional files. SG drafted the main manuscript. XX and XX revised the  
314 manuscript. **All authors have read and approved the manuscript.**

315  
316  
317  
318

## 319 REFERENCES

320

- 321 1. Lovén, J., Orlando, D.A., Sigova, A.A., Lin, C.Y., Rahl, P.B., Burge, C.B., Levens,  
322 D.L., Lee, T.I., and Young, R.A., *Revisiting global gene expression analysis*. Cell,  
323 2012. **151**(3): 476-482.
- 324 2. Gao, S., Ou, J., and Xiao, K., *R language and Bioconductor in bioinformatics*  
325 *applications(Chinese Edition)*. 2014, Tianjin: Tianjin Science and Technology  
326 Translation Publishing Ltd.
- 327 3. Tao, H. and Gao, S., *Computational Systems Biology: Methods and Protocols*. 2018,  
328 New York: Springer.
- 329 4. Bullard, J.H., Purdom, E., Hansen, K.D., and Dudoit, S., *Evaluation of statistical*  
330 *methods for normalization and differential expression in mRNA-Seq experiments*.  
331 BMC Bioinformatics, 2010. **11**(1): 94.
- 332 5. Jiang, L., Schlesinger, F., Davis, C.A., Zhang, Y., Li, R., Salit, M., Gingeras, T.R.,  
333 and Oliver, B., *Synthetic spike-in standards for RNA-seq experiments*. Genome  
334 Research, 2011. **21**(9): 1543.
- 335 6. Anders, S. and Huber, W., *Differential expression analysis for sequence count data*.  
336 Genome biology, 2010. **11**(10): R106.
- 337 7. Robinson, M.D., McCarthy, D.J., and Smyth, G.K., *edgeR: a Bioconductor package*  
338 *for differential expression analysis of digital gene expression data*. Bioinformatics,  
339 2010. **26**(1): 139-140.
- 340 8. Glusman, G., Caballero, J., Robinson, M., Kutlu, B., and Hood, L., *Optimal scaling*  
341 *of digital transcriptomes*. Plos One, 2013. **8**(11): e77885.
- 342 9. Li, P., Piao, Y., Shon, H.S., and Ryu, K.H., *Comparing the normalization methods*  
343 *for the differential analysis of Illumina high-throughput RNA-Seq data*. BMC  
344 Bioinformatics, 2015. **16**(1): 347.
- 345 10. Gao, S., Zhang, N., Duan, G.Y., Yang, Z., Ruan, J.S., and Zhang, T., *Prediction of*  
346 *function changes associated with single-point protein mutations using support*  
347 *vector machines (SVMs)*. Human Mutation, 2009. **30**(8): 1161-6.
- 348 11. Dobin, A., Davis, C.A., Schlesinger, F., Drenkow, J., Zaleski, C., Jha, S., Batut, P.,  
349 Chaisson, M., and Gingeras, T.R., *STAR: ultrafast universal RNA-seq aligner*.  
350 Bioinformatics, 2013. **29**(1): 15-21.

351 12. Gao, S., Tian, X., Chang, H., Sun, Y., Wu, Z., Cheng, Z., Dong, P., Zhao, Q., Ruan,  
352 J., and Bu, W., *Two novel lncRNAs discovered in human mitochondrial DNA using*  
353 *PacBio full-length transcriptome data*. Mitochondrion, 2017.  
354

## 355 **Figure legends**

### 356 **Figure 1. Normalization factor and library size**

357 (A). A raw gene expression matrix can be transformed into a normalized gene expression  
358 matrix by the multiplication of a factor  $f_j$  to each column. Each column represents the  
359 expression levels of all genes from a sample and each row represents the expression levels  
360 of a gene across all samples. (B). HG7, ERCC, TN, TC, CR, NR and TU use library sizes  
361  $N_j^*$  to calculate normalization factors.  $N_j$  represents the library size estimated by TC.  
362 DESeq, RLE, UQ and TMM have been modified in NormExpression to ignore zero values  
363 and the resulting normalization factors need be further normalized by their geometric mean  
364 values. After modification, RLE is identical to DESeq. Q3 means that about 75% of genes  
365 in the  $j$ th sample have expression levels below Q3 and about 25% have those above Q3. For  
366 all methods, log represents the natural logarithm.

367

368

### 369 **Figure 2. Parameter grid to evaluate normalization methods**

370 Parameter grid of non-zero ratio from 0.2 to 0.9 for scRNA663 and from 0.8 to 1 for  
371 bkRNA18 was used to produce AUCVC values All the normalization methods were  
372 classified into three groups based on their AUCVC values sorted in descending order using  
373 one scRNA-seq dataset scRNA663 (A) and one bulk RNA-seq dataset bkRNA18 (B).

374

### 375 **Figure 3. Consistency in the evaluation results by different metrics**

376 A normalization method with a higher AUCVC value produced a lower median of  
377 Spearman Correlation Coefficients (SCCs) between normalized expression profiles of  
378 ubiquitous gene pairs using both scRNA-seq (AB) and bulk RNA-seq data (DE). The  
379 hierarchical clustering result showed that 13 methods had been classified into the same  
380 groups (CF) by SCCs between normalization factor pairs as those (Figure 2AB) by  
381 AUCVC.

382
